# Supplementary material for: Single Nucleotide Polymorphisms of Toll-like Receptor 4 in Hepatocellular Carcinoma—A Single-Center Study
Source: MDPI journal article supplement (doi:10.3390/ijms23169430), 2022-08-21
Supplement: s1 [file s1]

## SupplementaryMaterials

Table S1. Causes of death in patients with HCC with and without TLR4 SNPs.

| Cause of death                    | SNPs | No SNPs | p value* |
|-----------------------------------|------|---------|----------|
| <b>Liver-related</b>              | 5    | 27      | >0.999   |
| Liver failure                     | 2    | 16      | 0.678    |
| Spontaneous Bacterial Peritonitis | 1    | 4       | >0.999   |
| Variceal bleeding                 | 2    | 4       | 0.257    |
| Hepatorenal syndrome              | 1    | 3       | 0.532    |
| <b>Non liver-related</b>          | 2    | 8       | >0.999   |
| Sepsis                            | 2    | 6       | 0.601    |
| Heart failure                     | 0    | 2       | >0.999   |

Abbreviations: SNPs: single nucleotide polymorphisms

\*p values are based on Fischer's exact test

Table S2: Characteristics of patients with HCC in relation to the presence of TLR4 SNPs.

| Characteristic                          | SNPs (N=10)      | no SNPs (N=42)    | p-value* |
|-----------------------------------------|------------------|-------------------|----------|
| Age in years, median (Q1-Q3)            | 59.5 (55-72)     | 69.5 (63-74)      | 0.270    |
| Gender (males), N (%)                   | 9 (90%)          | 33 (78.6%)        | 0.664    |
| Smoking, N (%)                          | 2 (20%)          | 10 (23.8%)        | >0.999   |
| Alcohol (Heavy drinkers), N (%)         | 3 (30%)          | 15 (35.7%)        | >0.999   |
| Hgb, median (Q1-Q3)                     | 11.15 (10-11.8)  | 10.75 (9.1-12.6)  | 0.530    |
| PLTs, median (Q1-Q3)                    | 112 (97-154)     | 138.5 (91-188)    | 0.353    |
| AST(IU/ml), median (Q1-Q3)              | 59.5 (37-71)     | 52 (36-104)       | 0.944    |
| ALT(IU/ml), median (Q1-Q3)              | 31 (27-55)       | 39 (20-70)        | 0.981    |
| gGT(IU/ml), median (Q1-Q3)              | 156 (112-245)    | 86.5 (44-216)     | 0.157    |
| ALP(IU/ml), median (Q1-Q3)              | 127 (116-157)    | 157 (91-235)      | 0.693    |
| Total bilirubin (mg/dl), median (Q1-Q3) | 1.76 (0.88-2.52) | 1.285 (0.9-3.15)  | 0.963    |
| INR, median (Q1-Q3)                     | 1.3 (1.14-1.63)  | 1.34 (1.18-1.84)  | 0.754    |
| Urea, median (Q1-Q3)                    | 39 (25-47)       | 42.5 (34-79)      | 0.312    |
| Creatinine, median (Q1-Q3)              | 0.82 (0.7-1)     | 0.975 (0.72-1.45) | 0.408    |
| Cholesterol                             | 156 (110-200)    | 133 (101-172)     | 0.378    |
| MELD score, median (Q1-Q3)              | 12 (9-18)        | 11 (10-18)        | 0.898    |
| CTP score, median (Q1-Q3)               | 7 (6-11)         | 7.5 (6-9)         | 0.972    |

Abbreviations: ALT: Alanine aminotransferase; ALP: Alkaline phosphatase; AST: Aspartate aminotransferase; CTP: Child-Turcotte-Pugh score; gGT: Gamma-glutamyl transferase; Hgb: Hemoglobin; INR: International normalized ratio; MELD: Model for end-stage liver disease; PLTs: Platelets; SNPs: Single nucleotide polymorphisms

\* p values represent Fischer exact test for categorical data and Mann Whitney U test for the numerical data
